# Supplementary material for: Interaction of adenine with synthetic receptors: a theoretical studyElectronic supplementary information (ESI) available: Cartesian coordinates of all the complexes. See http://www.rsc.org/suppdata/p2/b2/b200915n/
Source: Royal Society of Chemistry journal article supplement (doi:10.1039/b200915n), 2002-04-10
Supplement: b200915n.pdf [file b200915n.pdf]

Optimized geometries at the B3LYP/6-31+G\*\* computational level.

**A/5, p-WC**

|   |        |       |        |
|---|--------|-------|--------|
| N | -0.200 | 0.000 | 0.396  |
| C | -0.161 | 0.000 | 1.743  |
| N | 0.901  | 0.000 | 2.546  |
| C | 2.045  | 0.000 | 1.842  |
| C | 2.170  | 0.000 | 0.451  |
| C | 0.968  | 0.000 | -0.297 |
| N | 3.340  | 0.000 | 2.309  |
| C | 4.162  | 0.000 | 1.199  |
| N | 3.500  | 0.000 | 0.066  |
| N | 0.951  | 0.000 | -1.639 |
| H | -1.130 | 0.000 | 2.236  |
| H | 3.619  | 0.000 | 3.279  |
| H | 5.239  | 0.000 | 1.292  |
| H | 0.070  | 0.000 | -2.168 |
| H | 1.833  | 0.000 | -2.128 |
| C | -3.980 | 0.000 | -0.308 |
| O | -5.102 | 0.000 | -0.784 |
| N | -2.807 | 0.000 | -1.033 |
| H | -3.795 | 0.000 | 0.780  |
| H | -1.901 | 0.000 | -0.527 |
| C | -2.789 | 0.000 | -2.411 |
| N | -1.681 | 0.000 | -3.057 |
| H | -3.784 | 0.000 | -2.861 |
| H | -1.849 | 0.000 | -4.061 |

**A/5, p-H**

|   |        |       |        |
|---|--------|-------|--------|
| N | -3.206 | 0.000 | 0.783  |
| C | -3.252 | 0.000 | 2.121  |
| N | -2.234 | 0.000 | 2.991  |
| C | -1.058 | 0.000 | 2.353  |
| C | -0.840 | 0.000 | 0.971  |
| C | -2.005 | 0.000 | 0.159  |
| N | 0.204  | 0.000 | 2.913  |
| C | 1.103  | 0.000 | 1.876  |
| N | 0.523  | 0.000 | 0.695  |
| N | -1.991 | 0.000 | -1.185 |
| H | -4.249 | 0.000 | 2.555  |
| H | 0.409  | 0.000 | 3.902  |
| H | 2.171  | 0.000 | 2.047  |
| H | -2.889 | 0.000 | -1.646 |
| H | -1.141 | 0.000 | -1.757 |
| C | 3.496  | 0.000 | -1.654 |
| O | 4.317  | 0.000 | -2.555 |
| N | 2.129  | 0.000 | -1.819 |
| H | 3.784  | 0.000 | -0.588 |
| H | 1.525  | 0.000 | -0.979 |
| C | 1.532  | 0.000 | -3.063 |
| N | 0.256  | 0.000 | -3.180 |
| H | 2.245  | 0.000 | -3.888 |
| H | -0.012 | 0.000 | -4.163 |

**5/A/5**

|   |        |       |       |
|---|--------|-------|-------|
| N | -1.557 | 0.000 | 1.150 |
| C | -1.549 | 0.000 | 2.493 |
| N | -0.503 | 0.000 | 3.319 |
| C | 0.650  | 0.000 | 2.634 |
| C | 0.813  | 0.000 | 1.246 |
| C | -0.379 | 0.000 | 0.464 |

|   |        |       |        |
|---|--------|-------|--------|
| N | 1.929  | 0.000 | 3.146  |
| C | 2.789  | 0.000 | 2.075  |
| N | 2.163  | 0.000 | 0.918  |
| N | -0.403 | 0.000 | -0.870 |
| H | -2.528 | 0.000 | 2.967  |
| H | 2.171  | 0.000 | 4.126  |
| H | 3.862  | 0.000 | 2.206  |
| H | -1.304 | 0.000 | -1.359 |
| H | 0.450  | 0.000 | -1.435 |
| C | 5.106  | 0.000 | -1.506 |
| O | 5.900  | 0.000 | -2.430 |
| N | 3.735  | 0.000 | -1.630 |
| H | 5.426  | 0.000 | -0.449 |
| H | 3.154  | 0.000 | -0.776 |
| C | 3.096  | 0.000 | -2.853 |
| N | 1.817  | 0.000 | -2.920 |
| H | 3.779  | 0.000 | -3.704 |
| H | 1.507  | 0.000 | -3.891 |
| C | -5.354 | 0.000 | 0.506  |
| O | -6.485 | 0.000 | 0.050  |
| N | -4.196 | 0.000 | -0.238 |
| H | -5.151 | 0.000 | 1.591  |
| H | -3.280 | 0.000 | 0.248  |
| C | -4.197 | 0.000 | -1.618 |
| N | -3.096 | 0.000 | -2.274 |
| H | -5.198 | 0.000 | -2.053 |
| H | -3.275 | 0.000 | -3.276 |

**A/6, p-WC**

|   |        |       |        |
|---|--------|-------|--------|
| C | 0.042  | 0.000 | -4.205 |
| C | 0.101  | 0.000 | -2.798 |
| N | 1.266  | 0.000 | -2.124 |
| C | 2.408  | 0.000 | -2.826 |
| C | 2.457  | 0.000 | -4.217 |
| C | 1.242  | 0.000 | -4.908 |
| H | -0.918 | 0.000 | -4.701 |
| H | 3.324  | 0.000 | -2.240 |
| H | 3.410  | 0.000 | -4.736 |
| H | 1.225  | 0.000 | -5.994 |
| N | -1.033 | 0.000 | -1.980 |
| C | -2.348 | 0.000 | -2.363 |
| O | -2.785 | 0.000 | -3.505 |
| H | -3.015 | 0.000 | -1.482 |
| H | -0.865 | 0.000 | -0.963 |
| N | -0.796 | 0.000 | 1.036  |
| C | -1.905 | 0.000 | 1.801  |
| N | -2.000 | 0.000 | 3.130  |
| C | -0.788 | 0.000 | 3.706  |
| C | 0.448  | 0.000 | 3.054  |
| C | 0.417  | 0.000 | 1.640  |
| N | -0.474 | 0.000 | 5.047  |
| C | 0.905  | 0.000 | 5.132  |
| N | 1.495  | 0.000 | 3.960  |
| N | 1.531  | 0.000 | 0.887  |
| H | -2.847 | 0.000 | 1.257  |
| H | -1.135 | 0.000 | 5.810  |
| H | 1.414  | 0.000 | 6.087  |
| H | 1.468  | 0.000 | -0.136 |

|   |       |       |       |
|---|-------|-------|-------|
| H | 2.427 | 0.000 | 1.350 |
|---|-------|-------|-------|

**A/6, p-H**

|   |        |        |        |
|---|--------|--------|--------|
| C | 3.113  | 2.511  | -0.035 |
| C | 2.036  | 1.606  | -0.012 |
| N | 2.206  | 0.278  | 0.114  |
| C | 3.455  | -0.192 | 0.235  |
| C | 4.588  | 0.617  | 0.229  |
| C | 4.399  | 1.995  | 0.088  |
| H | 2.924  | 3.569  | -0.147 |
| H | 3.547  | -1.271 | 0.341  |
| H | 5.577  | 0.183  | 0.330  |
| H | 5.250  | 2.670  | 0.074  |
| N | 0.698  | 2.002  | -0.114 |
| C | 0.202  | 3.264  | -0.303 |
| O | 0.841  | 4.300  | -0.420 |
| H | -0.902 | 3.250  | -0.344 |
| H | -0.006 | 1.257  | -0.021 |
| N | -1.430 | -3.559 | -0.251 |
| C | -2.755 | -3.736 | -0.144 |
| N | -3.705 | -2.815 | 0.056  |
| C | -3.178 | -1.588 | 0.141  |
| C | -1.826 | -1.239 | 0.043  |
| C | -0.921 | -2.312 | -0.156 |
| N | -3.838 | -0.393 | 0.337  |
| C | -2.884 | 0.596  | 0.345  |
| N | -1.665 | 0.135  | 0.171  |
| N | 0.412  | -2.152 | -0.262 |
| H | -3.097 | -4.764 | -0.229 |
| H | -4.836 | -0.282 | 0.449  |
| H | -3.144 | 1.637  | 0.483  |
| H | 0.962  | -2.989 | -0.388 |
| H | 0.881  | -1.254 | -0.129 |

**A/7, p-WC**

|   |        |       |        |
|---|--------|-------|--------|
| N | 0.312  | 0.000 | 2.849  |
| C | 0.352  | 0.000 | 4.196  |
| N | 1.415  | 0.000 | 5.000  |
| C | 2.558  | 0.000 | 4.295  |
| C | 2.683  | 0.000 | 2.904  |
| C | 1.480  | 0.000 | 2.158  |
| N | 3.854  | 0.000 | 4.762  |
| C | 4.676  | 0.000 | 3.652  |
| N | 4.013  | 0.000 | 2.519  |
| N | 1.458  | 0.000 | 0.816  |
| H | -0.617 | 0.000 | 4.691  |
| H | 4.134  | 0.000 | 5.732  |
| H | 5.753  | 0.000 | 3.744  |
| H | 0.575  | 0.000 | 0.298  |
| H | 2.333  | 0.000 | 0.316  |
| C | -2.419 | 0.000 | 0.070  |
| N | -1.238 | 0.000 | -0.538 |
| C | -1.195 | 0.000 | -1.894 |
| C | -2.382 | 0.000 | -2.688 |
| C | -3.625 | 0.000 | -2.005 |
| C | -3.663 | 0.000 | -0.633 |
| N | 0.042  | 0.000 | -2.453 |

|   |        |       |        |
|---|--------|-------|--------|
| C | -2.232 | 0.000 | -4.095 |
| H | -4.549 | 0.000 | -2.577 |
| H | -4.589 | 0.000 | -0.076 |
| C | -0.978 | 0.000 | -4.659 |
| C | 0.136  | 0.000 | -3.773 |
| H | -3.116 | 0.000 | -4.728 |
| H | -0.818 | 0.000 | -5.728 |
| N | 1.461  | 0.000 | -4.238 |
| N | -2.350 | 0.000 | 1.462  |
| H | -1.398 | 0.000 | 1.868  |
| H | 2.144  | 0.000 | -3.489 |
| C | -3.382 | 0.000 | 2.368  |
| O | -4.579 | 0.000 | 2.125  |
| H | -2.995 | 0.000 | 3.402  |
| C | 1.943  | 0.000 | -5.525 |
| O | 1.280  | 0.000 | -6.548 |
| H | 3.048  | 0.000 | -5.536 |

**A/7, p-H**

|   |        |        |       |
|---|--------|--------|-------|
| N | 0.015  | 4.129  | 0.000 |
| C | -0.810 | 5.186  | 0.000 |
| N | -2.148 | 5.202  | 0.000 |
| C | -2.645 | 3.959  | 0.000 |
| C | -1.925 | 2.761  | 0.000 |
| C | -0.511 | 2.883  | 0.000 |
| N | -3.971 | 3.575  | 0.000 |
| C | -3.990 | 2.201  | 0.000 |
| N | -2.786 | 1.671  | 0.000 |
| N | 0.319  | 1.828  | 0.000 |
| H | -0.322 | 6.158  | 0.000 |
| H | -4.765 | 4.198  | 0.000 |
| H | -4.919 | 1.646  | 0.000 |
| H | 1.312  | 1.995  | 0.000 |
| H | 0.000  | 0.860  | 0.000 |
| C | 3.384  | -1.436 | 0.000 |
| N | 2.163  | -0.927 | 0.000 |
| C | 1.107  | -1.781 | 0.000 |
| C | 1.286  | -3.199 | 0.000 |
| C | 2.611  | -3.696 | 0.000 |
| C | 3.677  | -2.829 | 0.000 |
| N | -0.127 | -1.214 | 0.000 |
| C | 0.122  | -4.007 | 0.000 |
| H | 2.779  | -4.770 | 0.000 |
| H | 4.705  | -3.163 | 0.000 |
| C | -1.123 | -3.429 | 0.000 |
| C | -1.195 | -2.003 | 0.000 |
| H | 0.223  | -5.089 | 0.000 |
| H | -2.035 | -4.007 | 0.000 |
| N | -2.416 | -1.325 | 0.000 |
| N | 4.398  | -0.465 | 0.000 |
| H | 4.041  | 0.484  | 0.000 |
| H | -2.367 | -0.296 | 0.000 |
| C | 5.765  | -0.615 | 0.000 |
| O | 6.377  | -1.669 | 0.000 |
| H | 6.272  | 0.366  | 0.000 |
| C | -3.684 | -1.846 | 0.000 |
| O | -4.004 | -3.025 | 0.000 |
| H | -4.436 | -1.038 | 0.000 |
